# Supplementary material for: Synthesis of benzo[f]quinazoline-1,3(2H,4H)-diones
Source: publisher site journal article supplement (doi:10.3762/bjoc.20.228), 2024-10-28

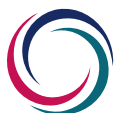

## Supporting Information

for

### Synthesis of benzo[*f*]quinazoline-1,3(2*H*,4*H*)-diones

Ruben Manuel Figueira de Abreu, Peter Ehlers and Peter Langer

*Beilstein J. Org. Chem.* **2024**, *20*, 2708–2719. doi:10.3762/bjoc.20.228

## Copies of NMR spectra

# $^1\text{H}$ , $^{13}\text{C}$ , and $^{19}\text{F}$ NMR spectra

## 1,3-Dimethyl-5-phenyl-6-(phenylethynyl)pyrimidine-2,4(1*H*,3*H*)-dione (4g).

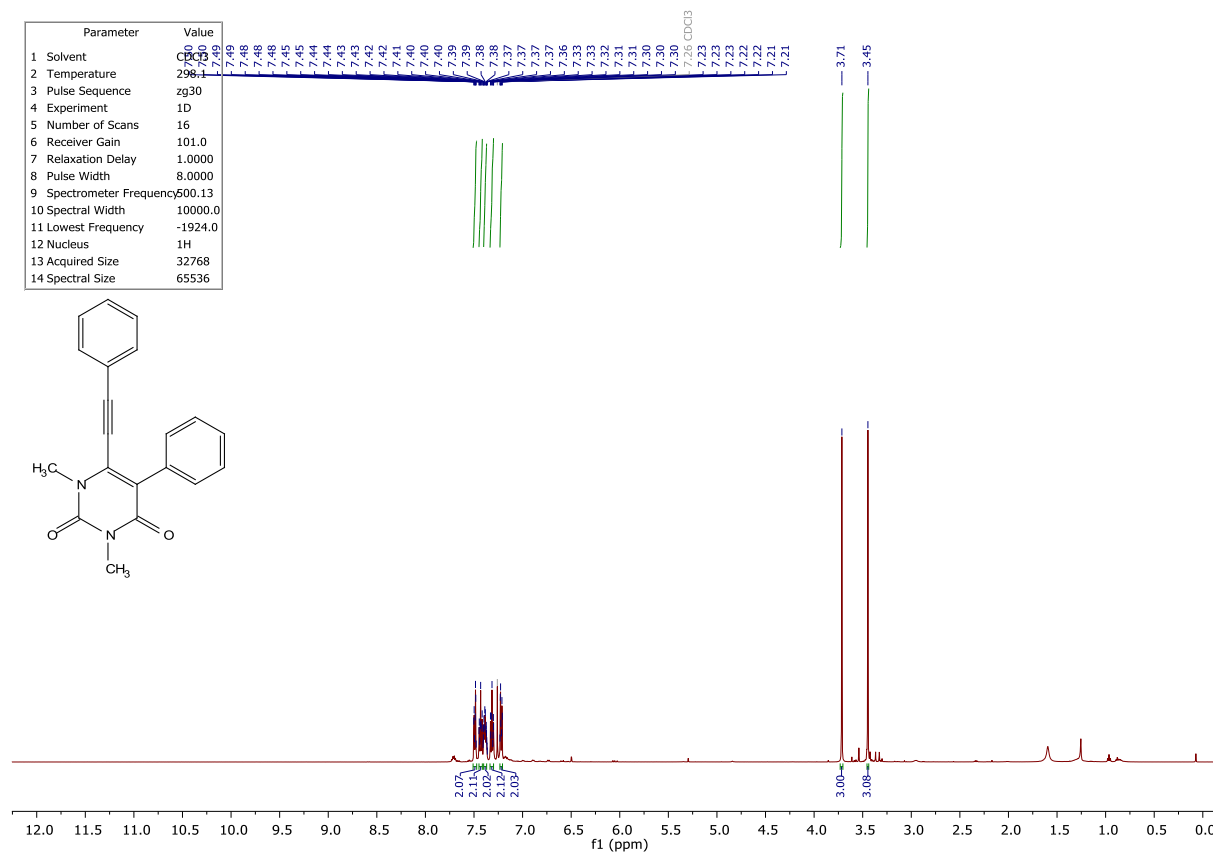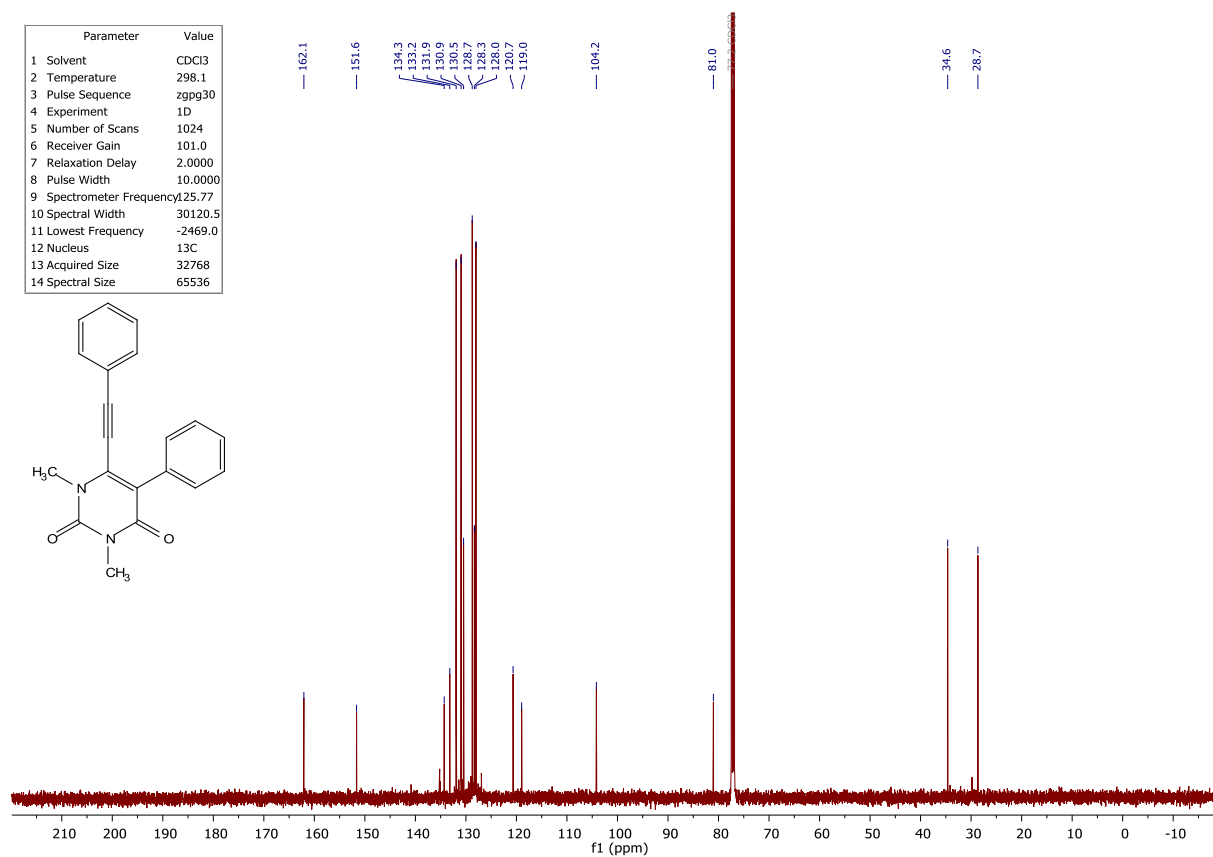

### 5-(4-Fluorophenyl)-6-((4-fluorophenyl)ethynyl)-1,3-dimethylpyrimidine-2,4(1H,3H)-dione (4h)

| Parameter                | Value   |
|--------------------------|---------|
| 1 Solvent                | CDCl3   |
| 2 Temperature            | 298.1   |
| 3 Pulse Sequence         | zg30    |
| 4 Experiment             | 1D      |
| 5 Number of Scans        | 16      |
| 6 Receiver Gain          | 101.0   |
| 7 Relaxation Delay       | 1.0000  |
| 8 Pulse Width            | 8.0000  |
| 9 Spectrometer Frequency | 500.13  |
| 10 Spectral Width        | 10000.0 |
| 11 Lowest Frequency      | -1924.0 |
| 12 Nucleus               | 1H      |
| 13 Acquired Size         | 32768   |
| 14 Spectral Size         | 65536   |

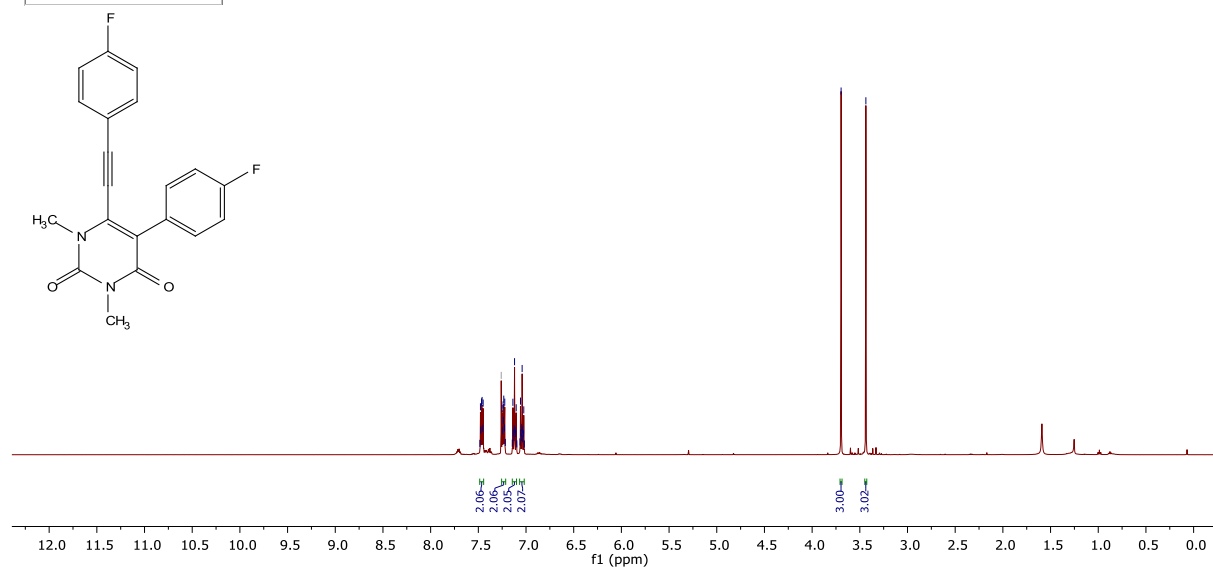

| Parameter                | Value     |
|--------------------------|-----------|
| 1 Solvent                | CDCl3     |
| 2 Temperature            | 298.3     |
| 3 Pulse Sequence         | zgig      |
| 4 Experiment             | 1D        |
| 5 Number of Scans        | 16        |
| 6 Receiver Gain          | 101.0     |
| 7 Relaxation Delay       | 1.0000    |
| 8 Pulse Width            | 12.0000   |
| 9 Spectrometer Frequency | 470.55    |
| 10 Spectral Width        | 113636.4  |
| 11 Lowest Frequency      | -103877.4 |
| 12 Nucleus               | 19F       |
| 13 Acquired Size         | 65536     |
| 14 Spectral Size         | 131072    |

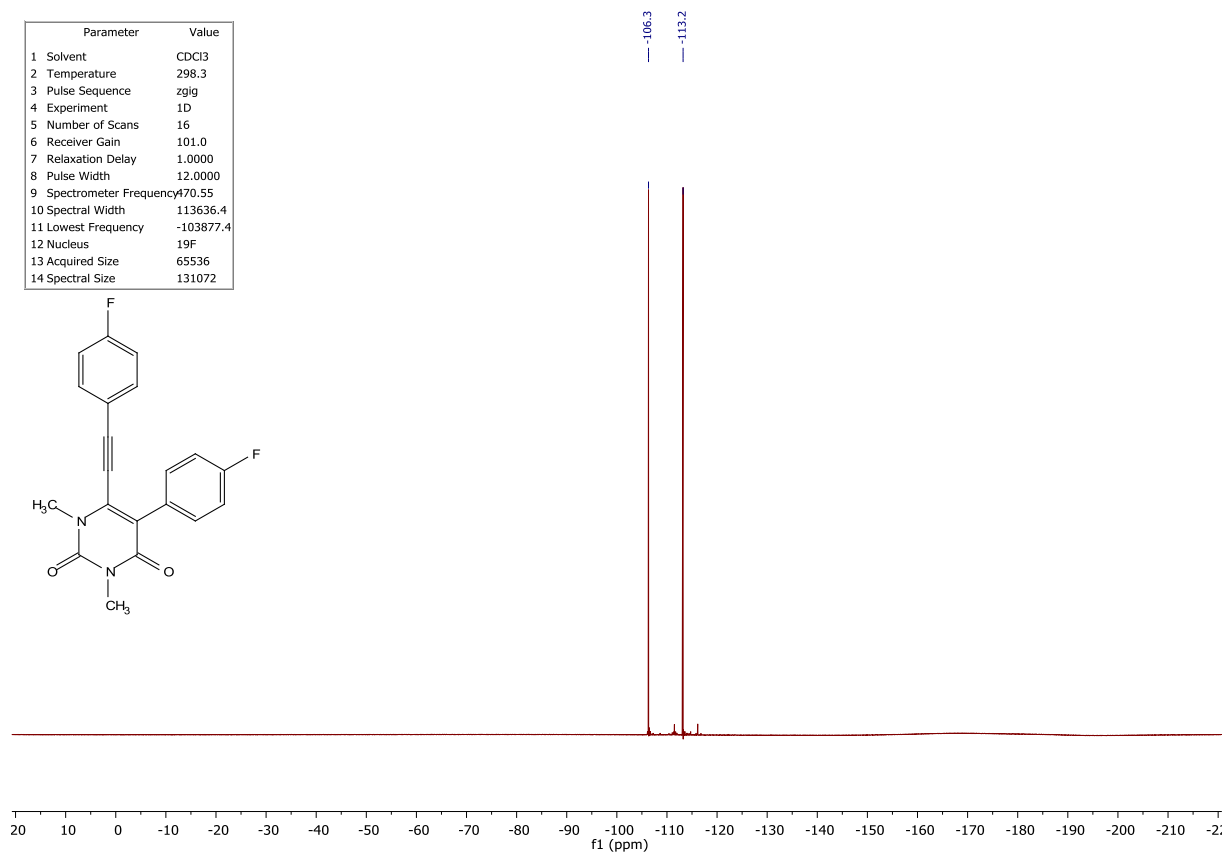

| Parameter                | Value   |
|--------------------------|---------|
| 1 Solvent                | CDCl3   |
| 2 Temperature            | 298.2   |
| 3 Pulse Sequence         | zgpg30  |
| 4 Experiment             | 1D      |
| 5 Number of Scans        | 2048    |
| 6 Receiver Gain          | 101.0   |
| 7 Relaxation Delay       | 2.0000  |
| 8 Pulse Width            | 10.0000 |
| 9 Spectrometer Frequency | 125.77  |
| 10 Spectral Width        | 30120.5 |
| 11 Lowest Frequency      | -2468.6 |
| 12 Nucleus               | 13C     |
| 13 Acquired Size         | 32768   |
| 14 Spectral Size         | 65536   |

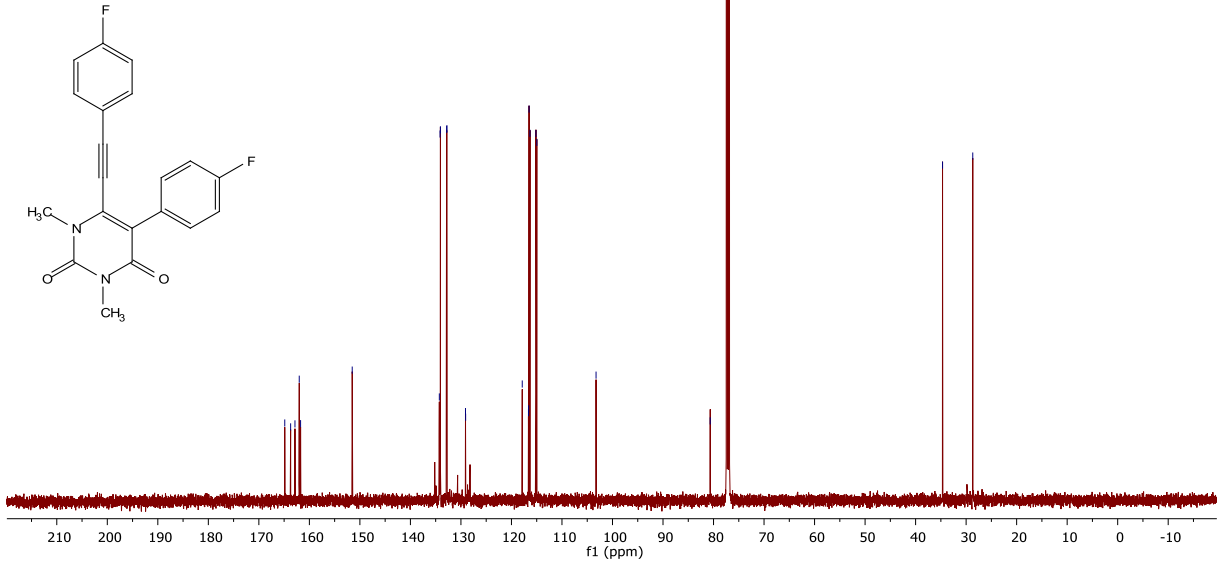

# 5-(Benzo[b]thiophen-3-yl)-1,3-dimethyl-6-(*p*-tolylethynyl)pyrimidine-2,4(1*H*,3*H*)-dione (4i)

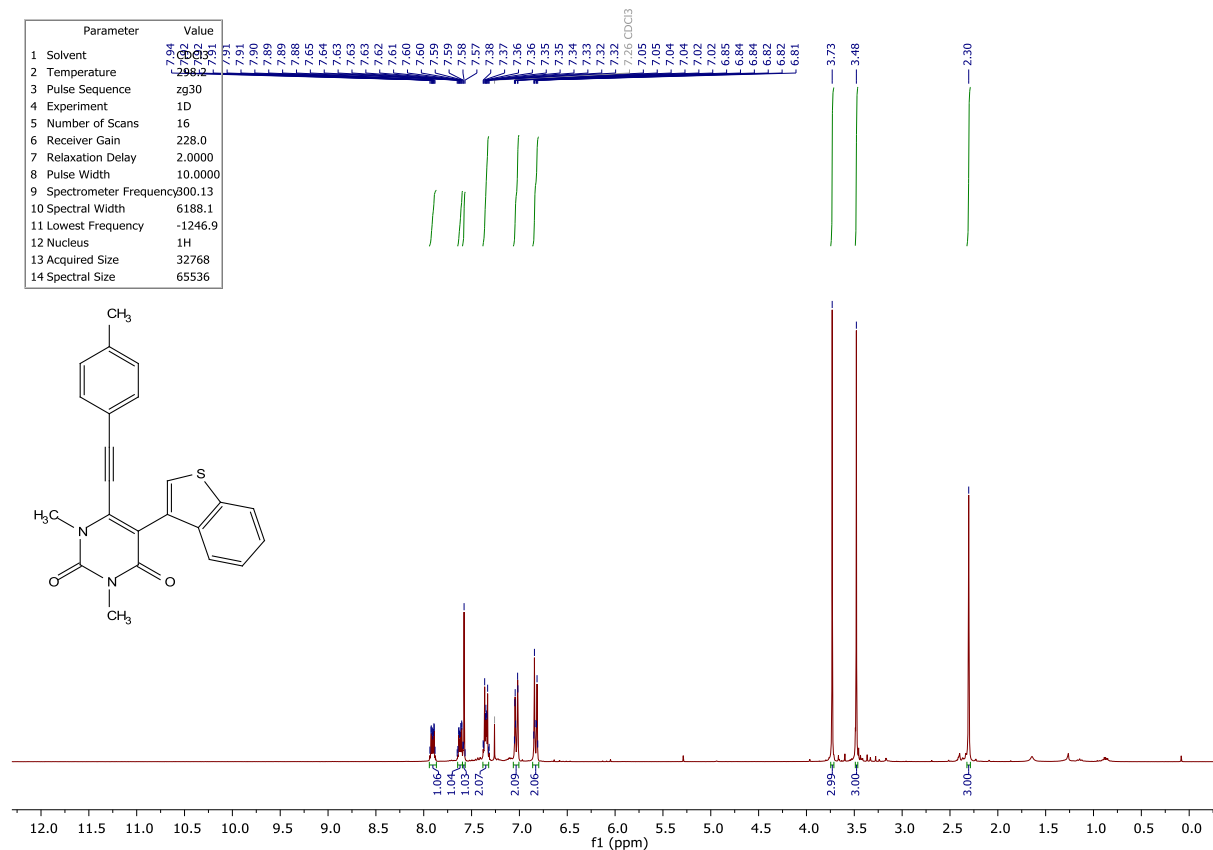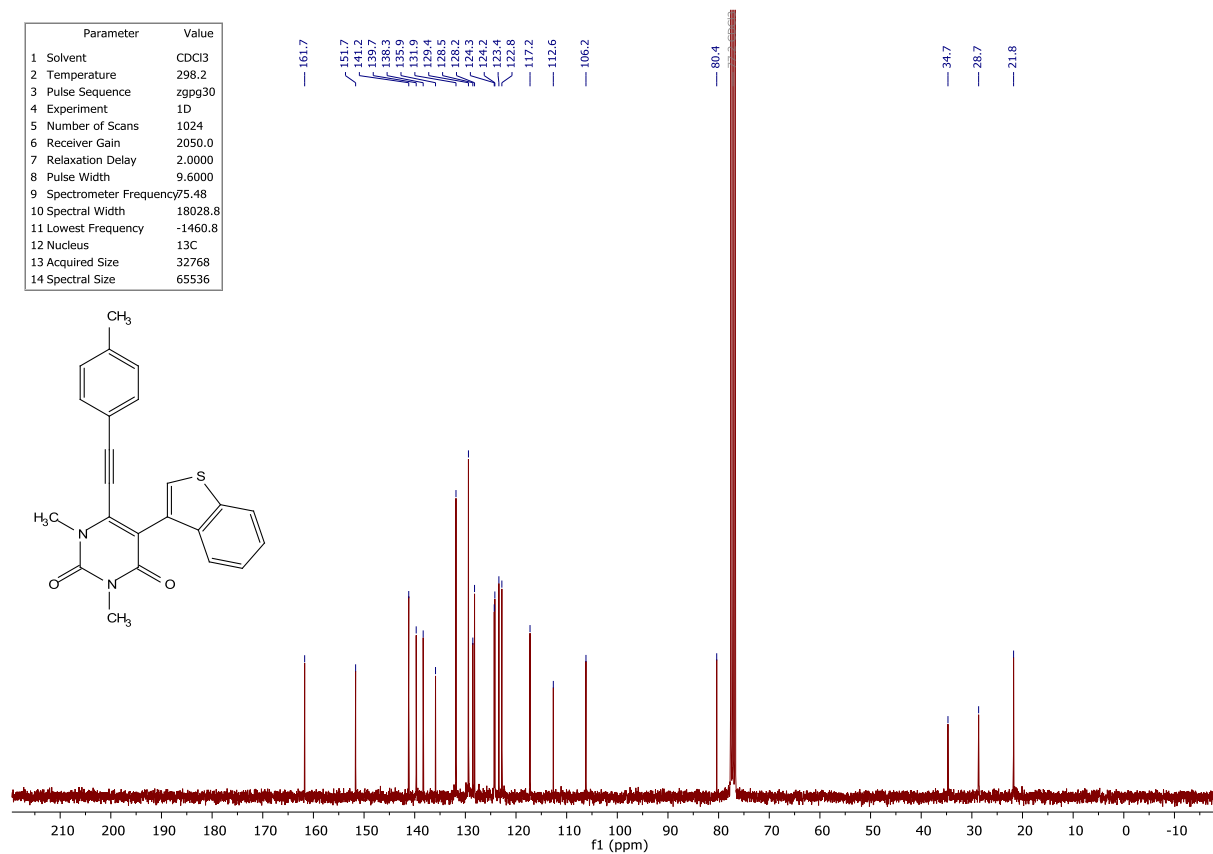

## 2,4,8-Trimethyl-6-(p-tolyl)benzo[f]quinazoline-1,3(2H,4H)-dione (5a)

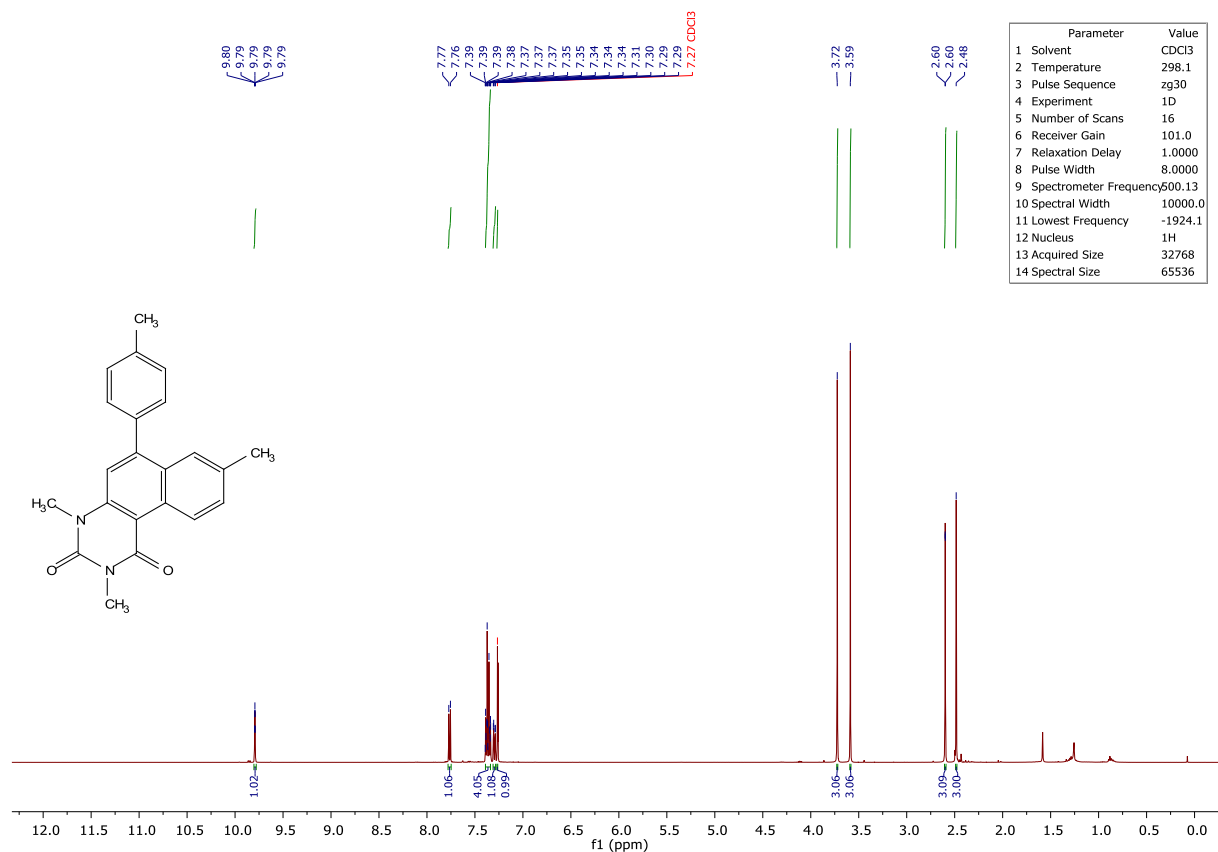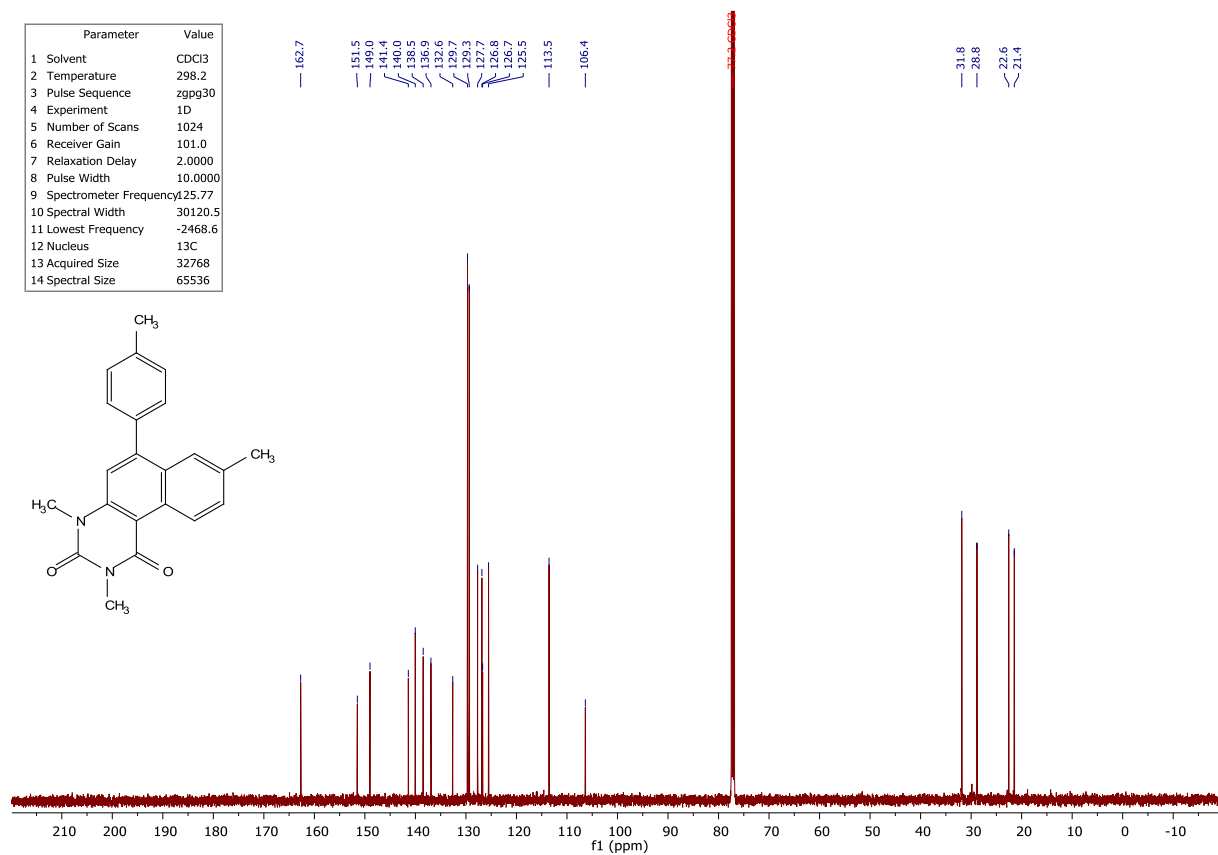

# 6-(4-(*N,N*-Dimethylamino)phenyl)-2,4,8-trimethylbenzo[*f*]quinazoline-1,3(2*H*,4*H*)-dione (5d)

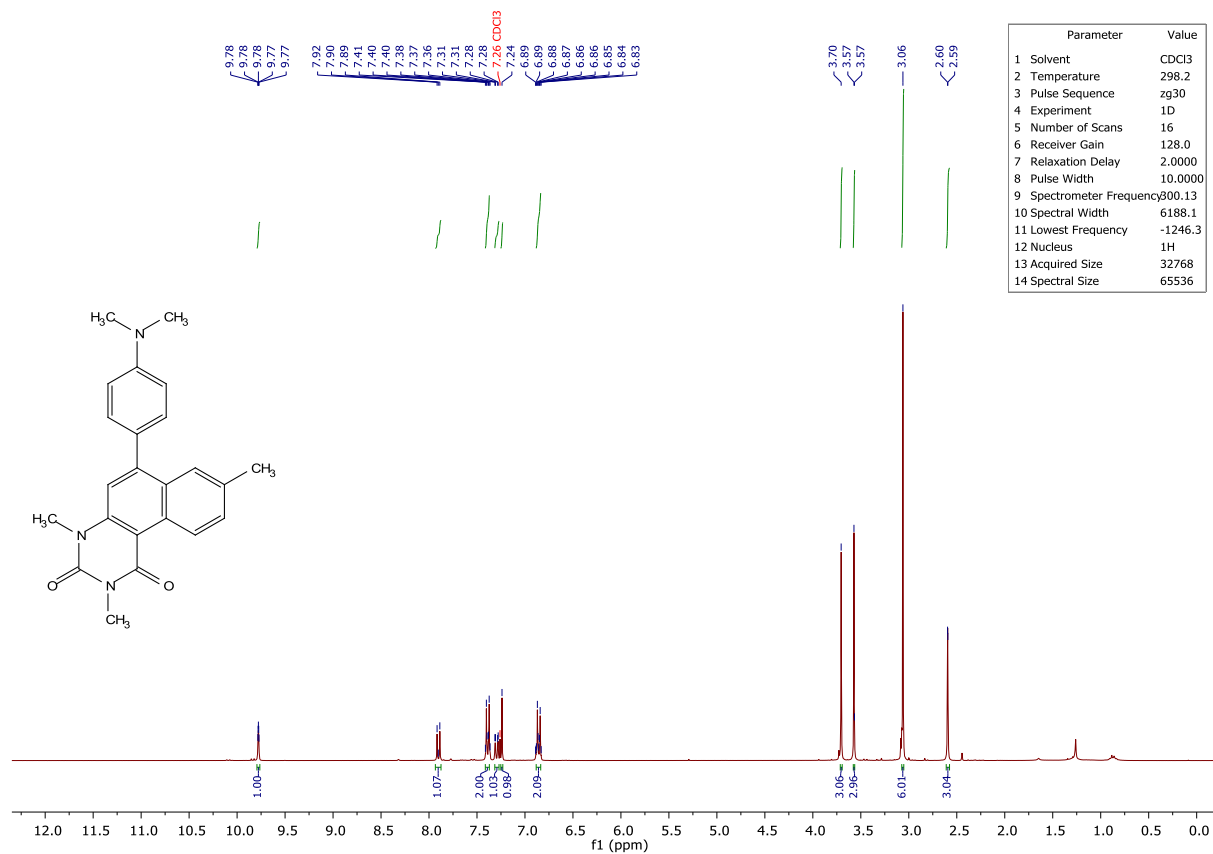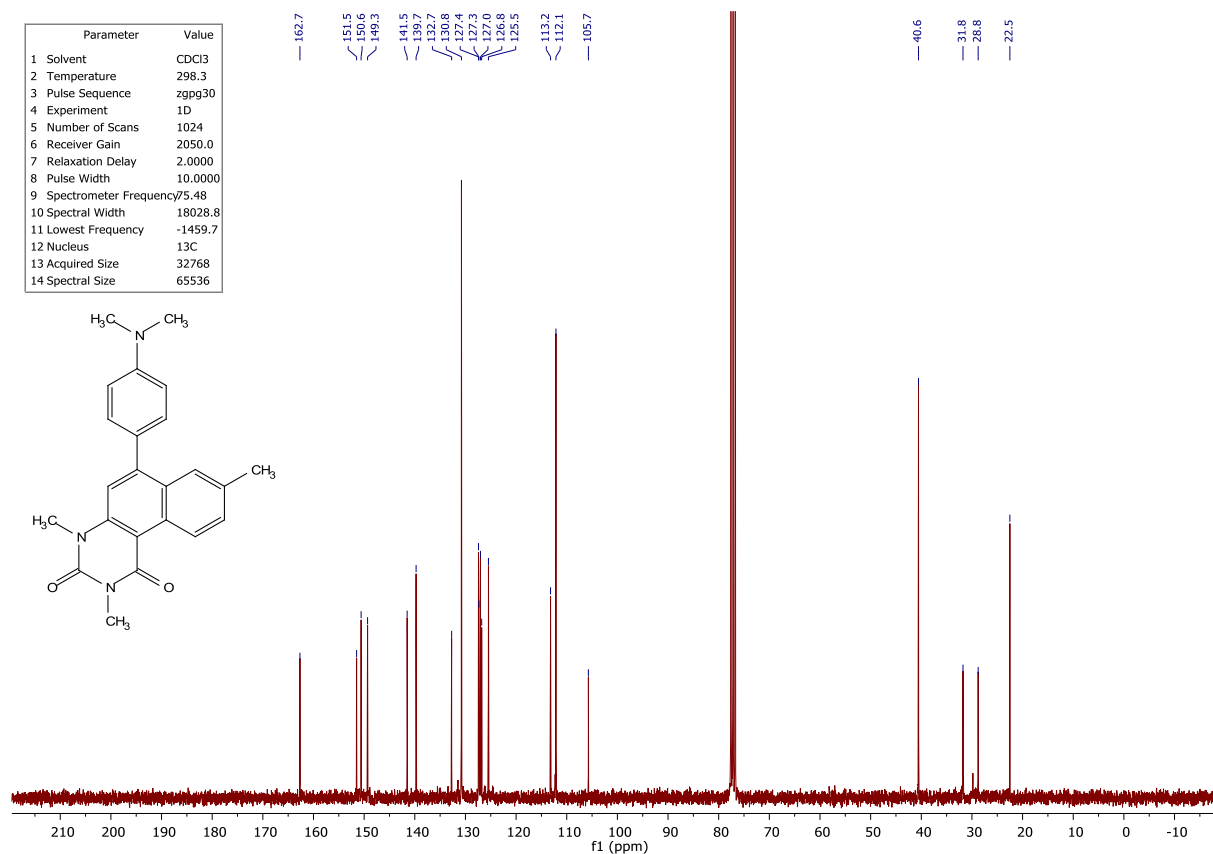

**6-(4-(*N,N*-Dimethylamino)phenyl)-2,4-dimethyl-8-(trifluoromethyl)benzo[*f*]quinazoline-1,3-(2*H*,4*H*)-dione (5f)**

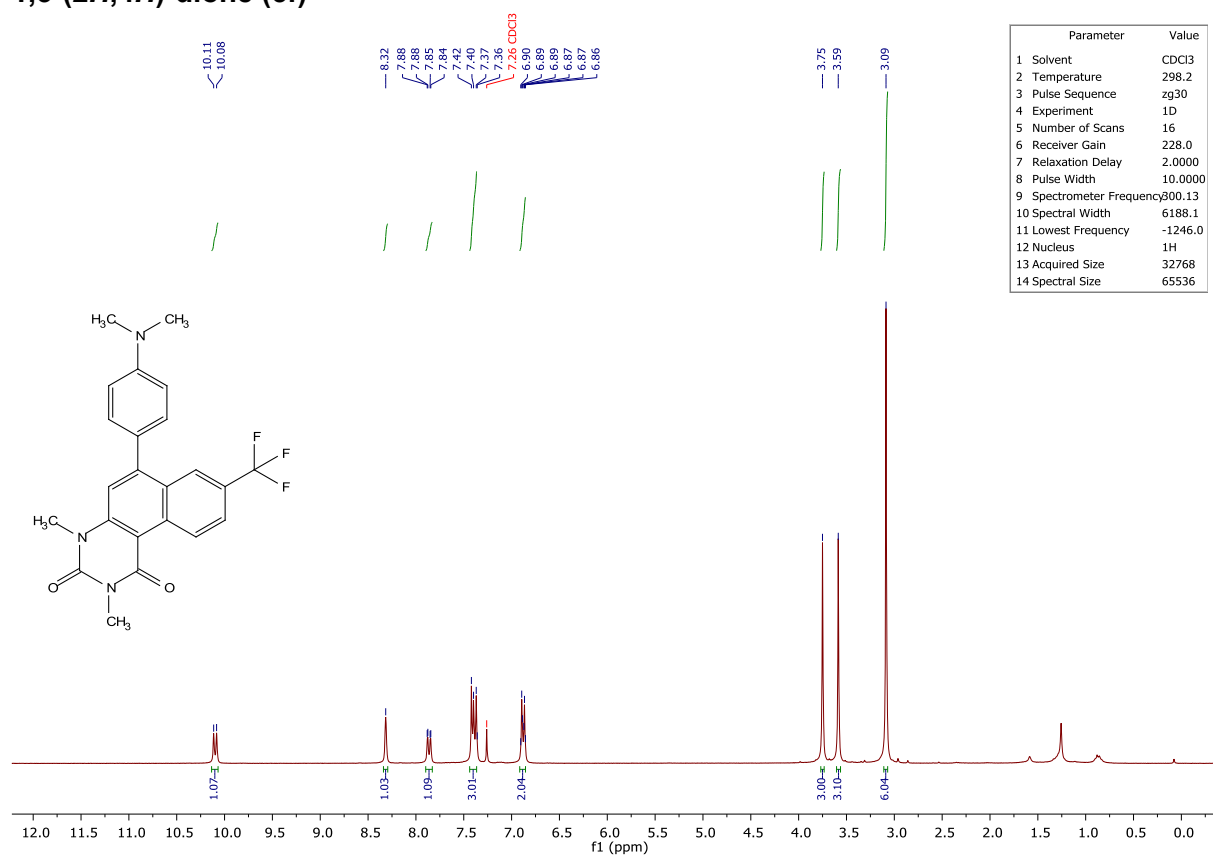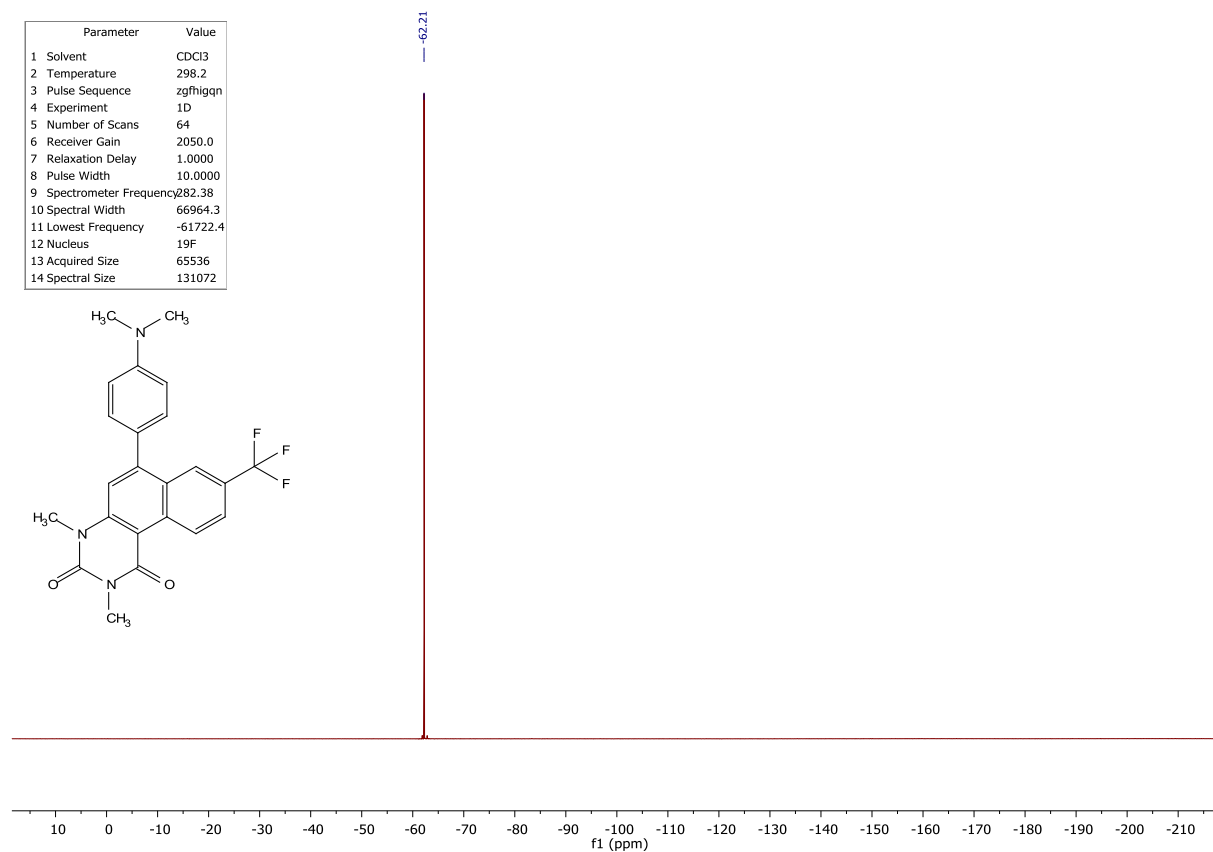



| Parameter                | Value   |
|--------------------------|---------|
| 1 Solvent                | CDCl3   |
| 2 Temperature            | 298.2   |
| 3 Pulse Sequence         | zgpg30  |
| 4 Experiment             | 1D      |
| 5 Number of Scans        | 1024    |
| 6 Receiver Gain          | 2050.0  |
| 7 Relaxation Delay       | 2.0000  |
| 8 Pulse Width            | 10.0000 |
| 9 Spectrometer Frequency | 75.48   |
| 10 Spectral Width        | 18028.8 |
| 11 Lowest Frequency      | -1468.1 |
| 12 Nucleus               | 13C     |
| 13 Acquired Size         | 32768   |
| 14 Spectral Size         | 65536   |

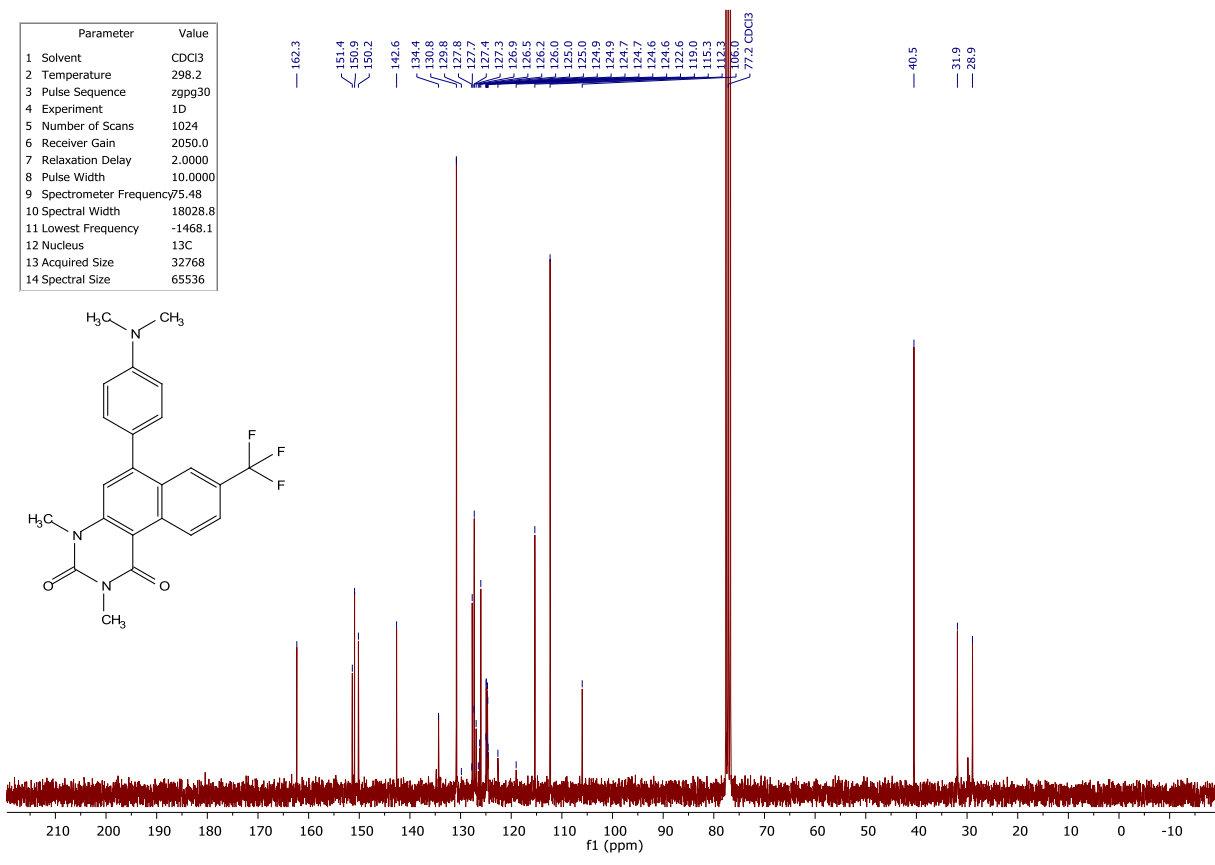

## 2,4-Dimethyl-6-phenylbenzo[f]quinazoline-1,3(2H,4H)-dione (5g)

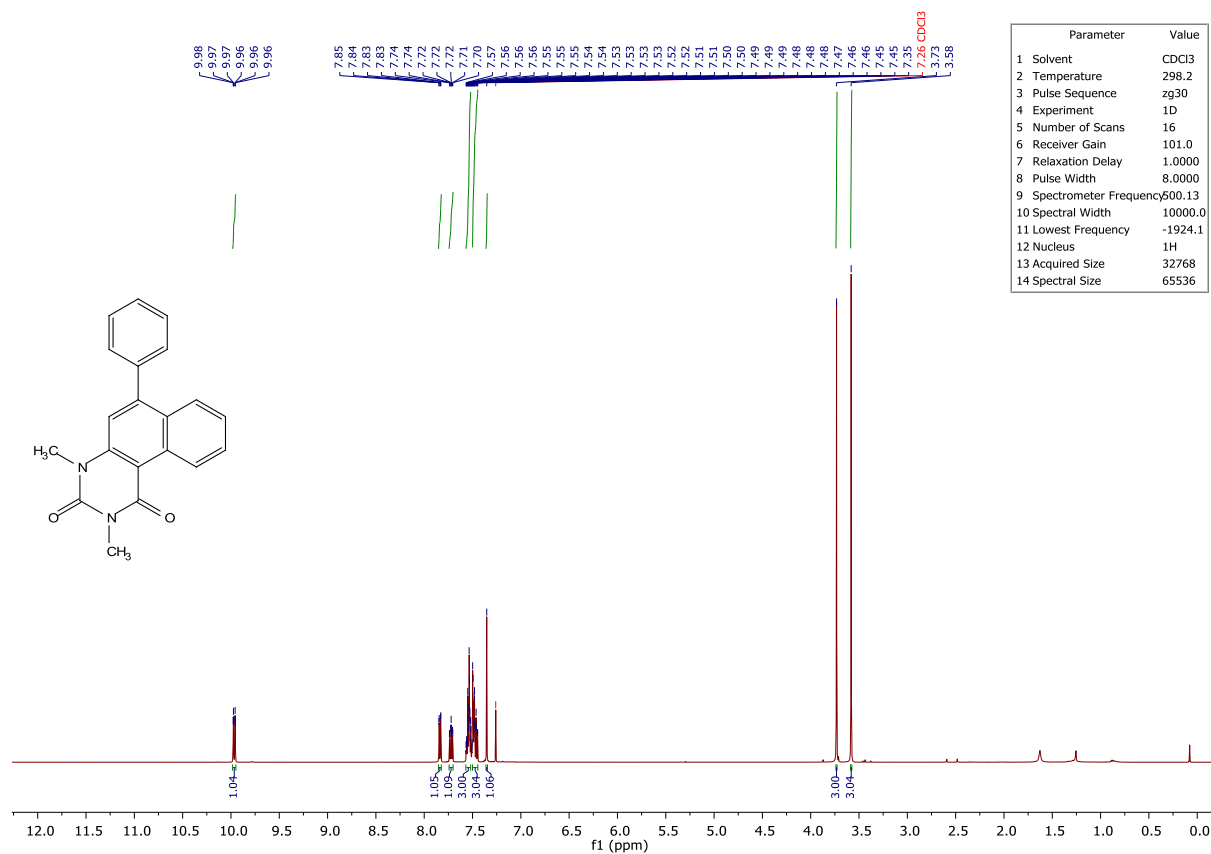

| Parameter                | Value   |
|--------------------------|---------|
| 1 Solvent                | CDCl3   |
| 2 Temperature            | 298.2   |
| 3 Pulse Sequence         | zg30    |
| 4 Experiment             | 1D      |
| 5 Number of Scans        | 16      |
| 6 Receiver Gain          | 101.0   |
| 7 Relaxation Delay       | 1.0000  |
| 8 Pulse Width            | 8.0000  |
| 9 Spectrometer Frequency | 500.13  |
| 10 Spectral Width        | 10000.0 |
| 11 Lowest Frequency      | -1924.1 |
| 12 Nucleus               | 1H      |
| 13 Acquired Size         | 32768   |
| 14 Spectral Size         | 65536   |

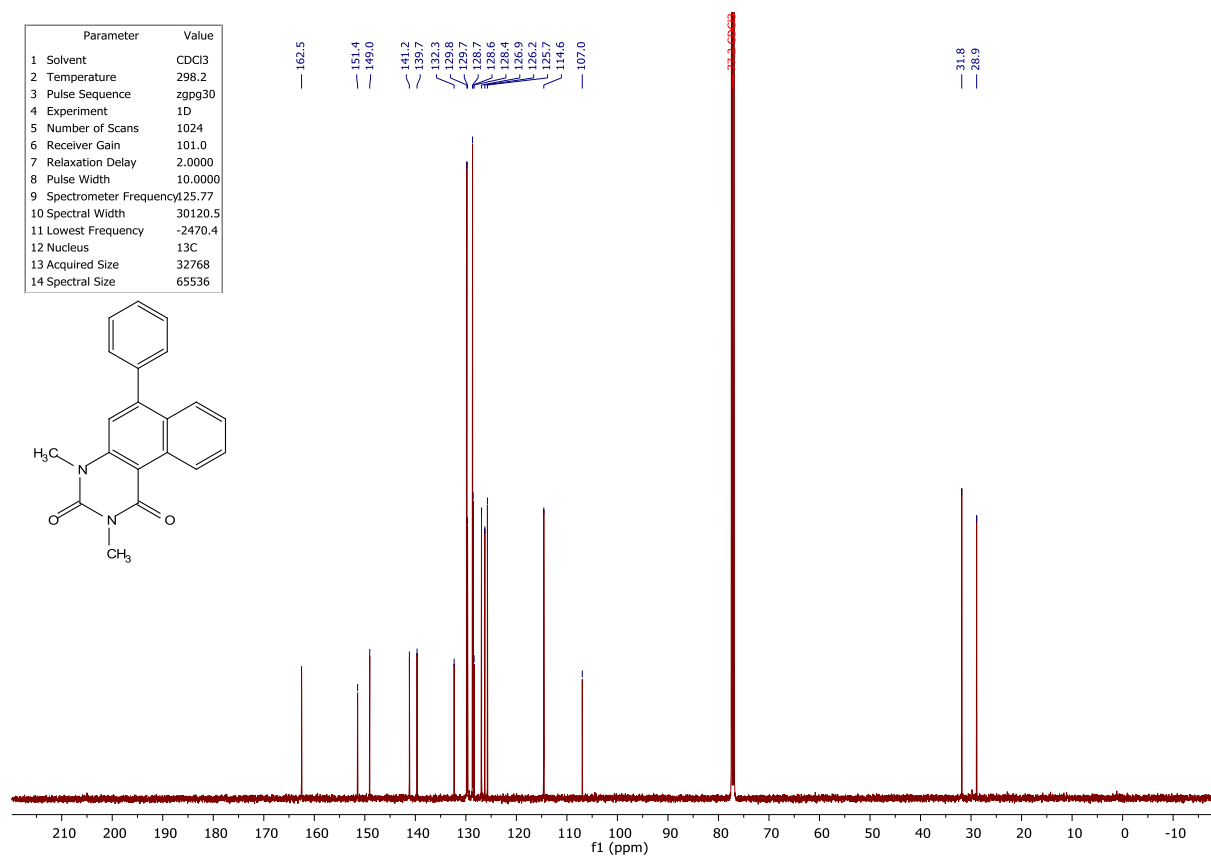

| Parameter                | Value   |
|--------------------------|---------|
| 1 Solvent                | CDCl3   |
| 2 Temperature            | 298.2   |
| 3 Pulse Sequence         | zgpg30  |
| 4 Experiment             | 1D      |
| 5 Number of Scans        | 1024    |
| 6 Receiver Gain          | 101.0   |
| 7 Relaxation Delay       | 2.0000  |
| 8 Pulse Width            | 10.0000 |
| 9 Spectrometer Frequency | 125.77  |
| 10 Spectral Width        | 30120.5 |
| 11 Lowest Frequency      | -2470.4 |
| 12 Nucleus               | 13C     |
| 13 Acquired Size         | 32768   |
| 14 Spectral Size         | 65536   |

# 6-(4-Fluorophenyl)-8-hydroxy-2,4-dimethylbenzo[*f*]quinazoline-1,3(2*H*,4*H*)-dione (5h)

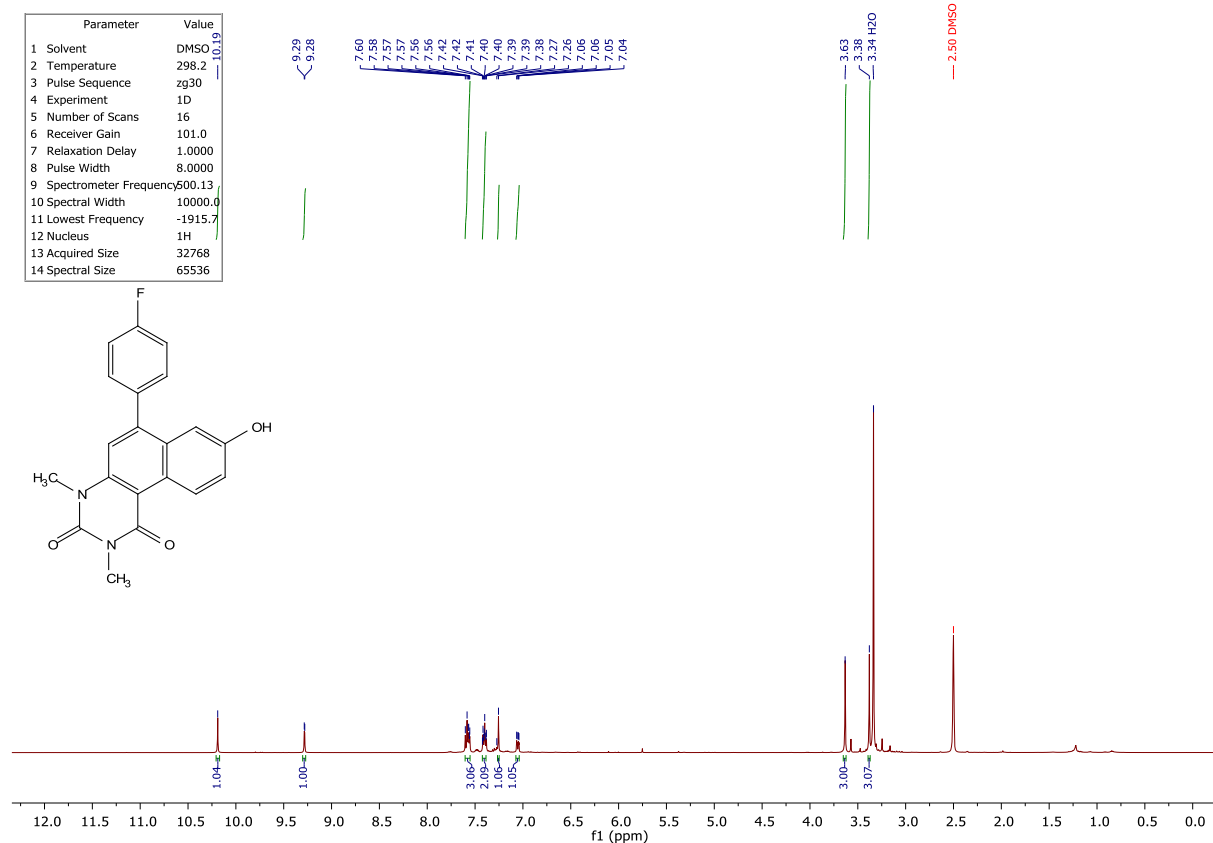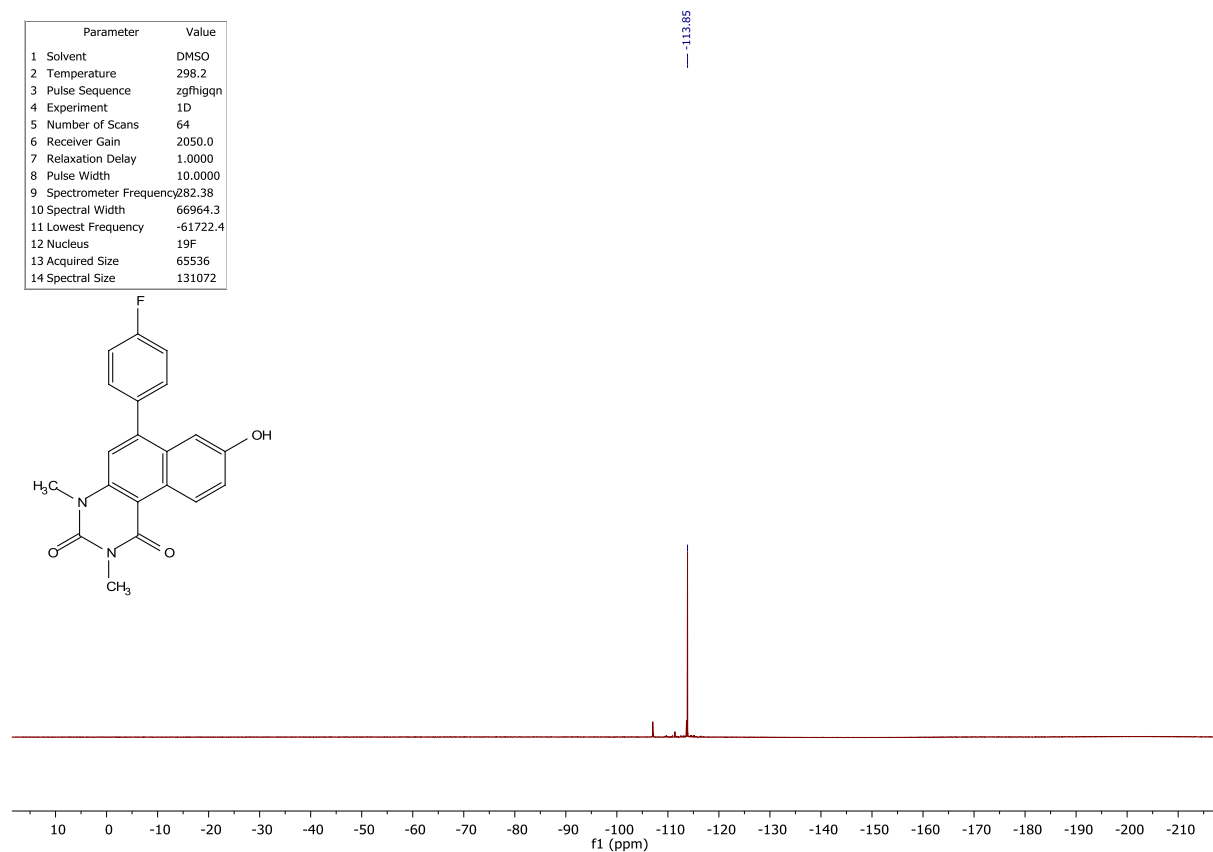

| Parameter                | Value           |
|--------------------------|-----------------|
| 1 Solvent                | DMSO            |
| 2 Temperature            | 298.2           |
| 3 Pulse Sequence         | zgpg30          |
| 4 Experiment             | 1D              |
| 5 Number of Scans        | 1024            |
| 6 Receiver Gain          | 101.0           |
| 7 Relaxation Delay       | 2.0000          |
| 8 Pulse Width            | 10.0000         |
| 9 Spectrometer Frequency | 125.77          |
| 10 Spectral Width        | 30120.5         |
| 11 Lowest Frequency      | -2484.5         |
| 12 Nucleus               | <sup>13</sup> C |
| 13 Acquired Size         | 32768           |
| 14 Spectral Size         | 65536           |

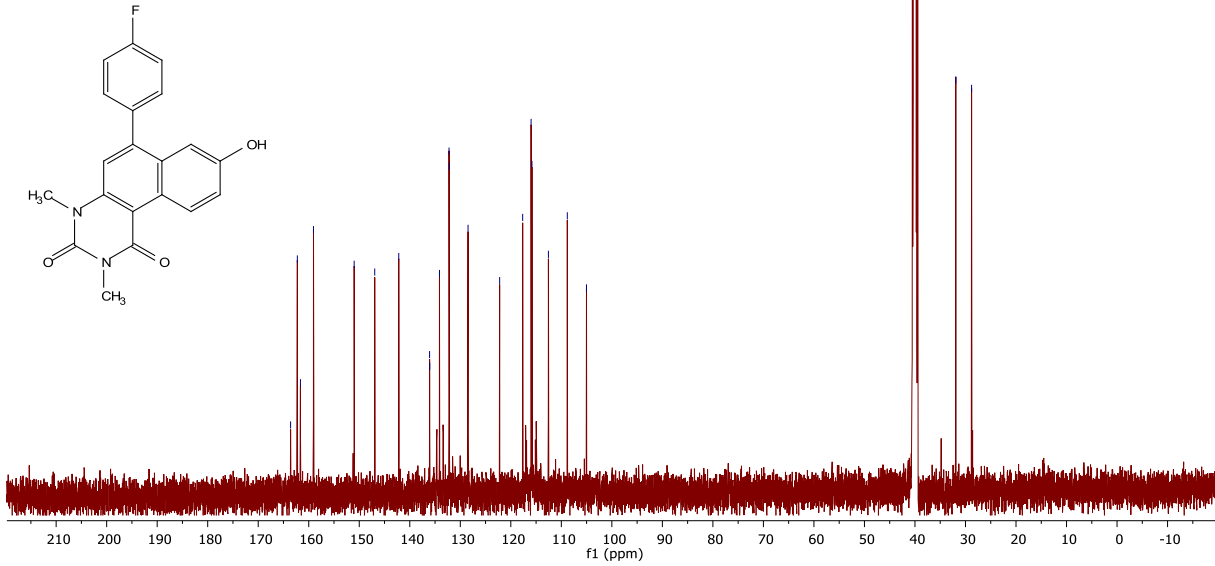

## 2,4-Dimethyl-6-(p-tolyl)benzo[4,5]thieno[3,2-f]quinazoline-1,3(2H,4H)-dione (5i)

| Parameter                | Value   |
|--------------------------|---------|
| 1 Solvent                | CDCl3   |
| 2 Temperature            | 298.2   |
| 3 Pulse Sequence         | zg30    |
| 4 Experiment             | 1D      |
| 5 Number of Scans        | 16      |
| 6 Receiver Gain          | 101.0   |
| 7 Relaxation Delay       | 1.0000  |
| 8 Pulse Width            | 8.0000  |
| 9 Spectrometer Frequency | 500.13  |
| 10 Spectral Width        | 10000.0 |
| 11 Lowest Frequency      | -1924.1 |
| 12 Nucleus               | 1H      |
| 13 Acquired Size         | 32768   |
| 14 Spectral Size         | 65536   |

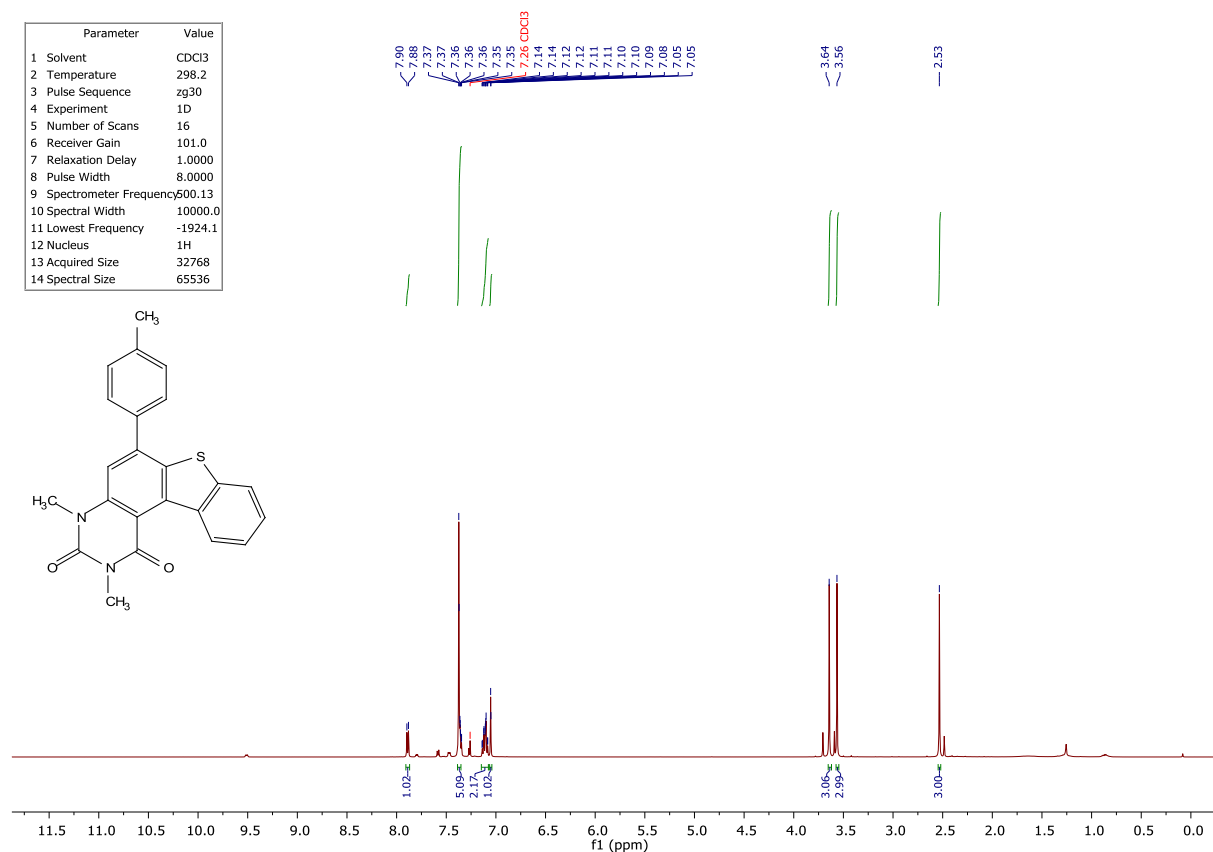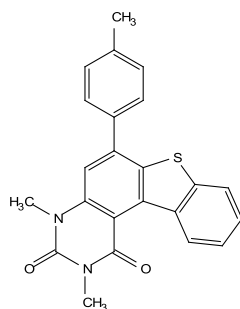

| Parameter                | Value   |
|--------------------------|---------|
| 1 Solvent                | CDCl3   |
| 2 Temperature            | 298.1   |
| 3 Pulse Sequence         | zgpg30  |
| 4 Experiment             | 1D      |
| 5 Number of Scans        | 4096    |
| 6 Receiver Gain          | 101.0   |
| 7 Relaxation Delay       | 2.0000  |
| 8 Pulse Width            | 10.0000 |
| 9 Spectrometer Frequency | 125.77  |
| 10 Spectral Width        | 30120.5 |
| 11 Lowest Frequency      | -2471.4 |
| 12 Nucleus               | 13C     |
| 13 Acquired Size         | 32768   |
| 14 Spectral Size         | 65536   |

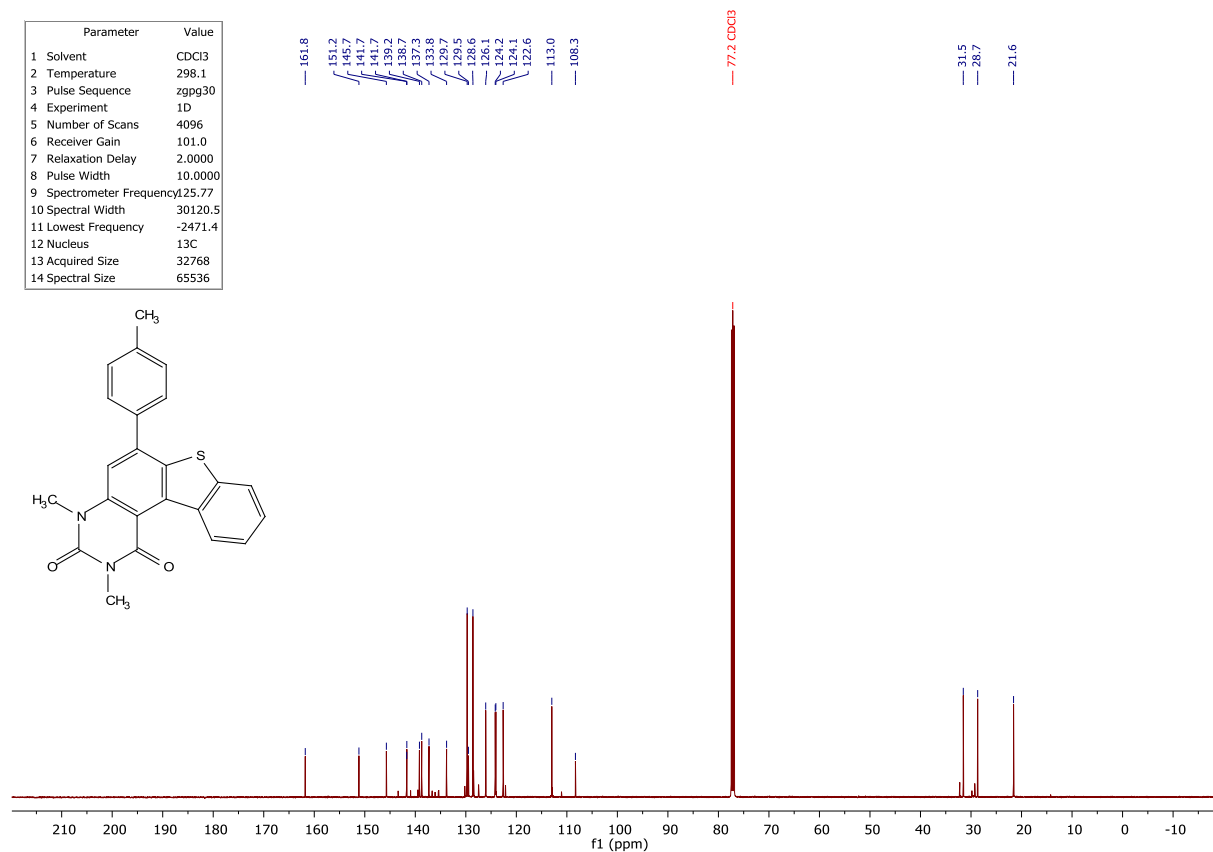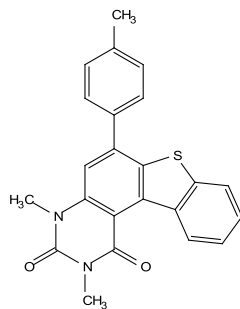

Supplement: Additional file 1 [file 1860-5397-20-228-S1.pdf]
